# Supplementary material for: Quantitative thermodynamic exposure assessment of PCBs available to sandworms (Alitta virens) in activated carbon remediated sediment during ongoing sediment deposition
Source: Royal Society of Chemistry journal article supplement (doi:10.1039/d3em00405h), 2024-01-01
Supplement: d3em00405h1.pdf [file d3em00405h1.pdf]

Supplementary Information for the article;

**Quantitative Thermodynamic Exposure Assessment (QTEA) of PCBs available to Sandworms (*Alitta virens*) in Activated Carbon Remediated Sediment during Ongoing Sediment Deposition**

Philip T. Gidley<sup>†\*</sup>, Guilherme R. Lotufo<sup>†</sup>, Stine N. Schmidt<sup>§</sup>, Philipp Mayer<sup>§</sup>, and Robert M. Burgess<sup>‡</sup>

<sup>†</sup>US Army Corps of Engineers, Engineer Research and Development Center, Vicksburg, MS, USA; <sup>§</sup>Technical University of Denmark, Department of Environmental & Resource Engineering, Kgs. Lyngby, Denmark; <sup>‡</sup>US Environmental Protection Agency, ORD/NHEERL/Atlantic Ecology Division, Narragansett, RI, USA

Corresponding Author (\*): philip.t.gidley@erdc.dren.mil

**Content of the Supporting Information**

**Figure S1.** Full experimental design of the larger investigation.

**Figure S2.** PCB congeners in worm lipid and predicted based on ESDs, all versus log  $K_{OW}$

**Figure S3.** Fraction of thermodynamic potential as defined by silicone equilibrium sampling. Analogous to Figure 3 in the article, but now including spiked influx mesocoms.

**Table S1.** Polymer-lipid partition coefficients ( $K_{PL}$ ) applied in the present study.

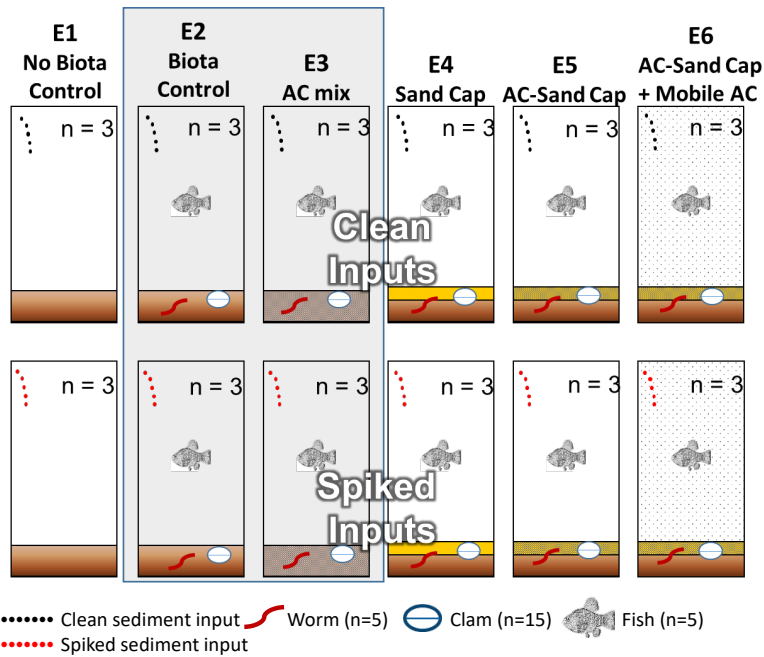

**Figure S1.** Full experimental design of the larger investigation showing all mesocosms (E1 to E6). Biota “control” (E2) and “AC mix” (E3) were the focus of this publication. Other results from the larger investigation have been published in Schmidt et al. (2017), Gidley et al. (2019, 2022), and Bridges et al. (2022).

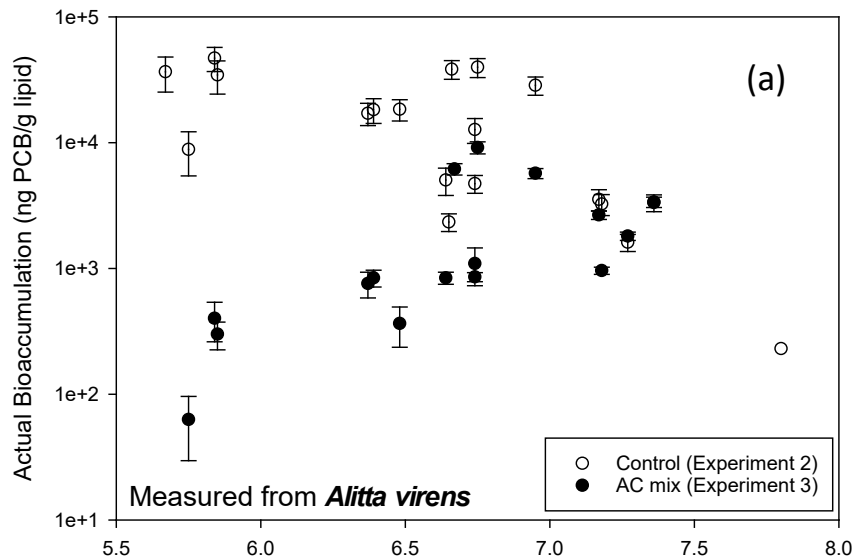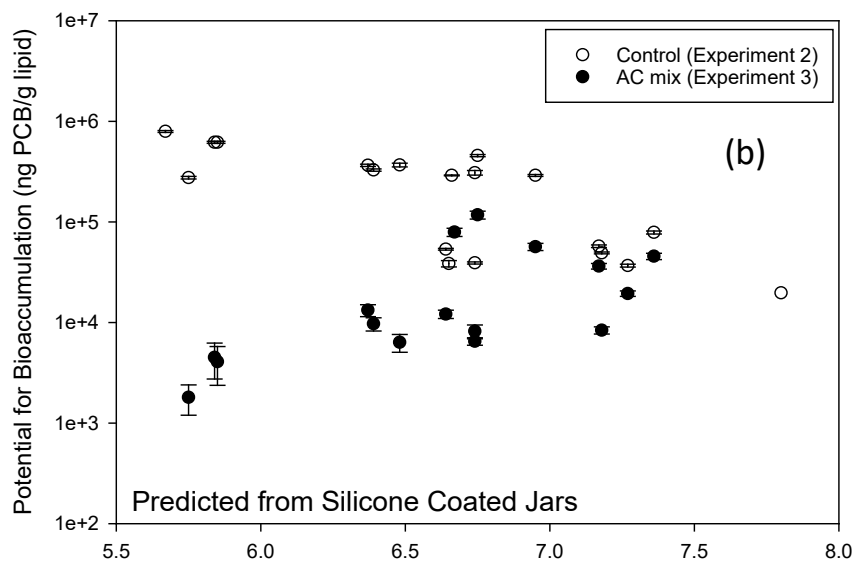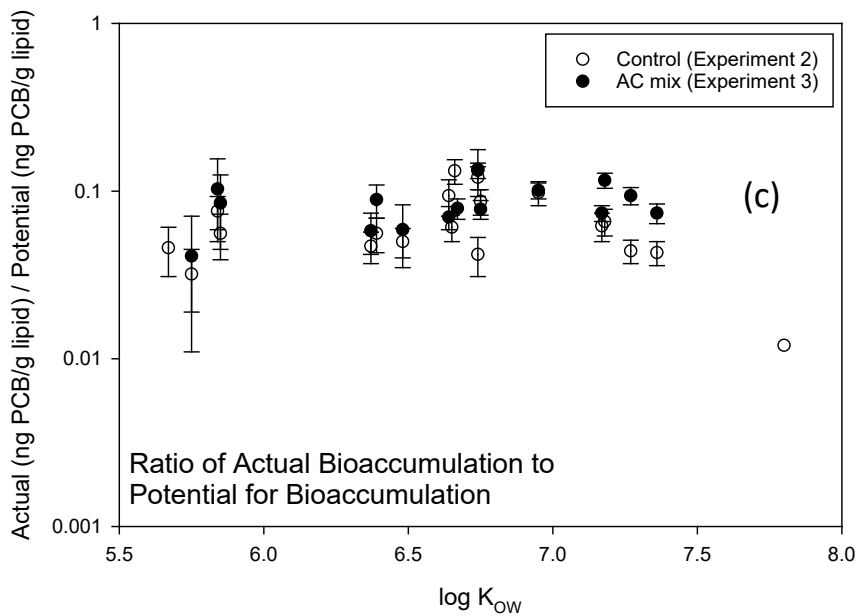

**Figure S2.** PCB congeners actually measured in worm lipid (a), “predicted” in lipid based on sediment ESDs (b), and the ratio of values in Figure S2a and Figure S2b all versus  $\log K_{ow}$  (Hawker and Connell 1988). Figure S2 averages across spiked and clean inputs, but compares AC mix versus untreated control. Figure S2 also shows the decrease in concentrations by AC tended to be lower for more hydrophobic PCBs, indicating lower remediation efficacy. Error bars show one standard deviation (SD) of the mean ( $n = 6$ ).

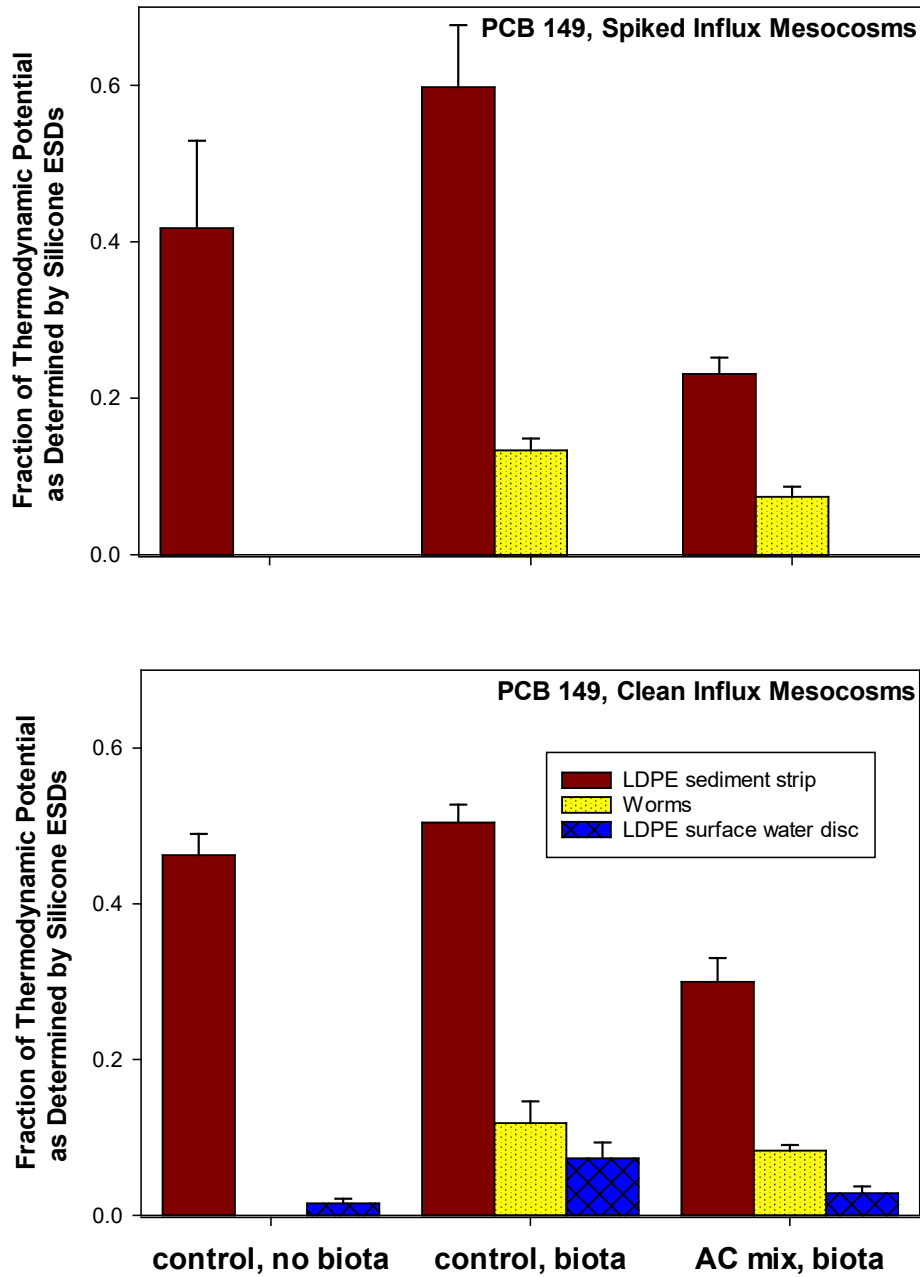

**Figure S3.** Fraction of thermodynamic potential as defined by silicone equilibrium sampling devices (ESDs) (similar to Figure 3 in the article). Silicone ESDs sampled surficial bed sediment. *In situ* low density polyethylene (LDPE) strips sampled surficial bed sediment. *In situ* LDPE discs sampled surface water (overlying water). LDPE discs are not shown in the spiked influx mesocosms. Error bars show one standard deviation of the mean (n=3).

**Table S1.** Polymer-lipid partition coefficients ( $K_{PL}$ ) applied in the present study (derived from Gilbert et al. (2016) for silicone and Smedes et al. (2017) for LDPE).

| Congener | Co-elute | Co-elute | $K_{PL}$ (LDPE) | $K_{PL}$ (Silicone) |
|----------|----------|----------|-----------------|---------------------|
| 18       |          |          | 0.0880          |                     |
| 28       | 31       |          | 0.1026          | 0.1157              |
| 44       |          |          | 0.0756          | 0.1756              |
| 49       |          |          | 0.0852          | 0.1189              |
| 52       |          |          | 0.0790          | 0.1263              |
| 77       |          |          | 0.0903          |                     |
| 81       | 117      |          | 0.1059          |                     |
| 99       |          |          |                 | 0.0828              |
| 90       | 101      |          |                 | 0.0838              |
| 105      |          |          | 0.0877          | 0.0925              |
| 110      |          |          |                 | 0.1110              |
| 114      |          |          | 0.1096          |                     |
| 118      |          |          | 0.0952          | 0.0682              |
| 123      |          |          | 0.1003          |                     |
| 126      | 129      |          | 0.0878          |                     |
| 128      |          |          |                 | 0.1282              |
| 138      | 163      | 164      | 0.0864          | 0.0809              |
| 149      | 147      |          |                 | 0.0945              |
| 151      |          |          |                 | 0.0991              |
| 132      | 153      |          |                 | 0.0586              |
| 156      | 157      |          | 0.0952          | 0.0593              |
| 167      |          |          | 0.1034          |                     |
| 170      |          |          | 0.0860          | 0.0761              |
| 180      |          |          | 0.0995          | 0.0509              |
| 187      |          |          | 0.0978          | 0.0687              |

## References

- Bridges, T.S., Gidley, P.T., Lotufo, G.R., Kennedy, A.J., Ruiz, C.E., Melby, N.L., Ballentine, M.L., Wooley, A., Laber, C., Ghosh, U., Burgess, R.M., Fernandez, L.A., Wang, A., Mayer, P., Schmidt, S., **2022**. Quantitative Thermodynamic Exposure Assessment (QTEA) Supporting Resilient Contaminated Sediment Site Restoration; Final Report for ER-2431; SERDP: Alexandria, VA.
- Gidley, P.T., Kennedy, A.J., Lotufo, G.R., Wooley, A.H., Melby, N.L., Ghosh, U., Burgess, R.M., Mayer, P., Fernandez, L.A., Schmidt, S.N. and Wang, A.P., Bridges, T.S., Ruiz, C.E., **2019**. Bioaccumulation in functionally different species: ongoing input of PCBs with sediment deposition to activated carbon remediated bed sediments. *Environmental Toxicology and Chemistry*, 38(10), pp.2326-2336.
- Gidley, P.T., Lotufo, G.R., Kennedy, A.J., Melby, N.L., Wooley, A.H., Laber, C.H., Burgess, R.M., Ruiz, C.E., Bridges, T.S., **2022**. Effect of Activated Carbon in Thin Sand Caps Challenged with Ongoing PCB Inputs from Sediment Deposition: PCB Uptake in Clams (*Mercenaria mercenaria*) and Passive Samplers. *Archives of Environmental Contamination and Toxicology*, 82(1), pp.95-104.
- Gilbert, D., Witt, G., Smedes, F., Mayer, P., **2016**. Polymers as reference partitioning phase: polymer calibration for an analytically operational approach to quantify multimedia phase partitioning. *Analytical Chemistry*, 88(11), pp.5818-5826.
- Hawker, D.W., Connell, D.W., **1988**. Octanol-water partition coefficients of polychlorinated biphenyl congeners. *Environmental Science & Technology*, 22(4), pp.382-387.
- Schmidt, S.N., Wang, A.P., Gidley, P.T., Wooley, A.H., Lotufo, G.R., Burgess, R.M., Ghosh, U., Fernandez, L.A., Mayer, P., **2017**. Cross validation of two partitioning-based sampling approaches in mesocosms containing PCB contaminated field sediment, biota, and activated carbon amendment. *Environmental Science & Technology*, 51(17), pp.9996-10004.
- Smedes, F., Rusina, T.P., Beeltje, H., Mayer, P., **2017**. Partitioning of hydrophobic organic contaminants between polymer and lipids for two silicones and low density polyethylene. *Chemosphere*, 186, pp.948-957.
